# Supplementary material for: The Potential Role of Proinflammatory Cytokines and Complement Components in the Development of Drug-Induced Neuropathy in Patients with Multiple Myeloma
Source: MDPI journal article supplement (doi:10.3390/jcm10194584), 2021-10-04
Supplement: s1 [file s1]

Table S3. Spearman's correlation coefficients for clinical data and investigated factors in the group with neuropathy during treatment.

|                      | Age           | RBC           | HGB          | HTC           | MCV           | PLT           | MPV           | Total protein | IgG          | IgA           | IgM           | FLCs kappa    | FLCs lambda   | Degree of neuropathy | Treatment cycle | CCL2          | IL-1beta      | ExCCL2       | ExINF-gamma  | ExProperdin   |
|----------------------|---------------|---------------|--------------|---------------|---------------|---------------|---------------|---------------|--------------|---------------|---------------|---------------|---------------|----------------------|-----------------|---------------|---------------|--------------|--------------|---------------|
| Age                  | 1,000         | 0,377         | 0,081        | 0,365         | 0,232         | 0,061         | 0,222         | <b>-0,370</b> | -0,318       | -0,284        | 0,136         | -0,092        | -0,247        | -0,048               | 0,046           | -0,083        | 0,040         | -0,116       | -0,077       | -0,136        |
| RBC                  | 0,377         | 1,000         | <b>0,915</b> | <b>0,988</b>  | -0,444        | 0,018         | 0,231         | -0,135        | -0,086       | 1,000         | 1,000         | <b>-0,733</b> | 0,117         | -0,060               | -0,572          | 0,370         | <b>-0,701</b> | 0,139        | 0,152        | -0,285        |
| HGB                  | 0,081         | <b>0,915</b>  | 1,000        | <b>0,952</b>  | -0,280        | -0,256        | 0,232         | -0,123        | -0,152       | 0,048         | 0,314         | -0,102        | -0,120        | -0,044               | -0,221          | 0,067         | -0,300        | 0,080        | 0,040        | -0,093        |
| HTC                  | 0,365         | <b>0,988</b>  | <b>0,952</b> | 1,000         | -0,426        | -0,042        | 0,304         | -0,055        | -0,086       | 1,000         | 1,000         | <b>-0,683</b> | -0,008        | -0,121               | -0,628          | 0,345         | <b>-0,701</b> | 0,176        | 0,236        | -0,200        |
| MCV                  | 0,232         | -0,444        | -0,280       | -0,426        | 1,000         | -0,103        | 0,171         | 0,328         | -0,086       | -0,105        | 0,500         | 0,435         | -0,172        | 0,151                | 0,238           | <b>-0,681</b> | 0,429         | 0,195        | 0,122        | 0,608         |
| PLT                  | 0,061         | 0,018         | -0,256       | -0,042        | -0,103        | 1,000         | <b>-0,825</b> | -0,081        | 0,246        | -0,047        | 0,047         | 0,147         | 0,328         | -0,064               | 0,153           | 0,332         | -0,043        | 0,056        | 0,033        | 0,123         |
| MPV                  | 0,222         | 0,231         | 0,232        | 0,304         | 0,171         | <b>-0,825</b> | 1,000         | 0,119         | 0,571        | -0,100        | -0,200        | -0,304        | <b>-0,671</b> | -0,054               | -0,536          | <b>-0,642</b> | -0,068        | -0,164       | 0,150        | 0,082         |
| Total protein        | <b>-0,370</b> | -0,135        | -0,123       | -0,055        | 0,328         | -0,081        | 0,119         | 1,000         | <b>0,602</b> | 0,216         | <b>-0,507</b> | <b>0,353</b>  | 0,091         | 0,071                | -0,091          | -0,162        | 0,293         | -0,082       | -0,043       | 0,074         |
| IgG                  | -0,318        | -0,086        | -0,152       | -0,086        | -0,086        | 0,246         | 0,571         | <b>0,602</b>  | 1,000        | -0,171        | -0,287        | 0,315         | 0,093         | 0,205                | 0,055           | 0,084         | 0,126         | 0,015        | 0,107        | 0,085         |
| IgA                  | -0,284        | 1,000         | 0,048        | 1,000         | -0,105        | -0,047        | -0,100        | 0,216         | -0,171       | 1,000         | -0,203        | 0,244         | 0,177         | -0,176               | -0,213          | -0,325        | 0,045         | -0,189       | -0,079       | <b>-0,425</b> |
| IgM                  | 0,136         | 1,000         | 0,314        | 1,000         | 0,500         | 0,047         | -0,200        | <b>-0,507</b> | -0,287       | -0,203        | 1,000         | -0,327        | 0,184         | 0,084                | 0,053           | 0,093         | 0,210         | 0,153        | 0,008        | 0,322         |
| FLCs kappa           | -0,092        | <b>-0,733</b> | -0,102       | <b>-0,683</b> | 0,435         | 0,147         | -0,304        | <b>0,353</b>  | 0,315        | 0,244         | -0,327        | 1,000         | -0,273        | -0,251               | 0,008           | -0,260        | 0,109         | 0,280        | <b>0,447</b> | -0,069        |
| FLCs lambda          | -0,247        | 0,117         | -0,120       | -0,008        | -0,172        | 0,328         | <b>-0,671</b> | 0,091         | 0,093        | 0,177         | 0,184         | -0,273        | 1,000         | <b>0,387</b>         | -0,137          | <b>0,414</b>  | -0,002        | -0,143       | 0,004        | 0,211         |
| Degree of neuropathy | -0,048        | -0,060        | -0,044       | -0,121        | 0,151         | -0,064        | -0,054        | 0,071         | 0,205        | -0,176        | 0,084         | -0,251        | <b>0,387</b>  | 1,000                | 0,097           | 0,064         | 0,126         | -0,121       | 0,042        | 0,032         |
| Treatment cycle      | 0,046         | -0,572        | -0,221       | -0,628        | 0,238         | 0,153         | -0,536        | -0,091        | 0,055        | -0,213        | 0,053         | 0,008         | -0,137        | 0,097                | 1,000           | 0,069         | -0,248        | <b>0,356</b> | 0,208        | 0,036         |
| CCL2                 | -0,083        | 0,370         | 0,067        | 0,345         | <b>-0,681</b> | 0,332         | <b>-0,642</b> | -0,162        | 0,084        | -0,325        | 0,093         | -0,260        | <b>0,414</b>  | 0,064                | 0,069           | 1,000         | <b>-0,430</b> | -0,036       | 0,155        | 0,091         |
| IL-1beta             | 0,040         | <b>-0,701</b> | -0,300       | <b>-0,701</b> | 0,429         | -0,043        | -0,068        | 0,293         | 0,126        | 0,045         | 0,210         | 0,109         | -0,002        | 0,126                | -0,248          | <b>-0,430</b> | 1,000         | -0,194       | -0,156       | 0,096         |
| ExCCL2               | -0,116        | 0,139         | 0,080        | 0,176         | 0,195         | 0,056         | -0,164        | -0,082        | 0,015        | -0,189        | 0,153         | 0,280         | -0,143        | -0,121               | <b>0,356</b>    | -0,036        | -0,194        | 1,000        | <b>0,645</b> | 0,248         |
| ExINF-gamma          | -0,077        | 0,152         | 0,040        | 0,236         | 0,122         | 0,033         | 0,150         | -0,043        | 0,107        | -0,079        | 0,008         | <b>0,447</b>  | 0,004         | 0,042                | 0,208           | 0,155         | -0,156        | <b>0,645</b> | 1,000        | 0,173         |
| ExProperdin          | -0,136        | -0,285        | -0,093       | -0,200        | 0,608         | 0,123         | 0,082         | 0,074         | 0,085        | <b>-0,425</b> | 0,322         | -0,069        | 0,211         | 0,032                | 0,036           | 0,091         | 0,096         | 0,248        | 0,173        | 1,000         |

In bold, p-values <0.05
