# Supplementary material for: The Potential Role of Proinflammatory Cytokines and Complement Components in the Development of Drug-Induced Neuropathy in Patients with Multiple Myeloma
Source: MDPI journal article supplement (doi:10.3390/jcm10194584), 2021-10-04
Supplement: s1 [file s1]

Table S4. Spearman's correlation coefficients for clinical data and investigated factors in the group without neuropathy during treatment.

|                        | Age           | WBC          | RBC           | HGB           | HTC          | MCV           | PLT           | MPV           | Total protein | FLCs lambda  | Total Ca <sup>2+</sup> | CCL2         | IFN-gamma     | ExCCL2       | ExINF-gamma  | ExIL1beta     | ExProperdin   | ExFactorD     |
|------------------------|---------------|--------------|---------------|---------------|--------------|---------------|---------------|---------------|---------------|--------------|------------------------|--------------|---------------|--------------|--------------|---------------|---------------|---------------|
| Age                    | 1,000         | -0,167       | -0,014        | -0,115        | 0,022        | 0,037         | -0,124        | 0,125         | <b>-0,408</b> | <b>0,475</b> | 0,159                  | -0,230       | 0,091         | 0,070        | 0,072        | -0,082        | -0,211        | 0,226         |
| WBC                    | -0,167        | 1,000        | 0,226         | 0,340         | 0,187        | -0,258        | <b>0,505</b>  | -0,146        | 0,138         | -0,137       | 0,268                  | <b>0,561</b> | -0,062        | 0,280        | 0,176        | 0,031         | -0,018        | 0,185         |
| RBC                    | -0,014        | 0,226        | 1,000         | <b>0,828</b>  | <b>0,895</b> | <b>-0,716</b> | 0,386         | -0,382        | -0,205        | -0,001       | 0,215                  | 0,262        | 0,110         | 0,011        | 0,291        | <b>-0,403</b> | 0,199         | -0,293        |
| HGB                    | -0,115        | 0,340        | <b>0,828</b>  | 1,000         | <b>0,893</b> | <b>-0,417</b> | 0,291         | -0,283        | 0,017         | 0,038        | 0,248                  | 0,180        | -0,018        | -0,023       | 0,274        | -0,227        | -0,010        | -0,128        |
| HTC                    | 0,022         | 0,187        | <b>0,895</b>  | <b>0,893</b>  | 1,000        | -0,371        | 0,261         | -0,272        | -0,180        | 0,128        | 0,290                  | 0,160        | -0,029        | -0,020       | 0,356        | -0,342        | 0,258         | -0,292        |
| MCV                    | 0,037         | -0,258       | <b>-0,716</b> | <b>-0,417</b> | -0,371       | 1,000         | <b>-0,444</b> | 0,367         | 0,149         | 0,231        | -0,135                 | -0,267       | -0,228        | -0,095       | -0,002       | 0,363         | 0,021         | 0,045         |
| PLT                    | -0,124        | <b>0,505</b> | 0,386         | 0,291         | 0,261        | <b>-0,444</b> | 1,000         | <b>-0,427</b> | 0,319         | 0,057        | <b>0,483</b>           | 0,216        | -0,127        | 0,168        | 0,247        | -0,321        | 0,210         | -0,209        |
| MPV                    | 0,125         | -0,146       | -0,382        | -0,283        | -0,272       | 0,367         | <b>-0,427</b> | 1,000         | -0,322        | -0,043       | 0,024                  | 0,008        | <b>-0,459</b> | -0,037       | 0,111        | -0,005        | -0,308        | -0,021        |
| Total protein          | <b>-0,408</b> | 0,138        | -0,205        | 0,017         | -0,180       | 0,149         | 0,319         | -0,322        | 1,000         | -0,065       | 0,152                  | -0,107       | 0,117         | 0,082        | -0,020       | -0,085        | 0,332         | -0,153        |
| FLCs lambda            | <b>0,475</b>  | -0,137       | -0,001        | 0,038         | 0,128        | 0,231         | 0,057         | -0,043        | -0,065        | 1,000        | -0,047                 | -0,315       | -0,115        | 0,040        | 0,222        | -0,070        | -0,148        | 0,261         |
| Total Ca <sup>2+</sup> | 0,159         | 0,268        | 0,215         | 0,248         | 0,290        | -0,135        | <b>0,483</b>  | 0,024         | 0,152         | -0,047       | 1,000                  | -0,075       | -0,343        | 0,100        | 0,141        | <b>-0,621</b> | 0,019         | -0,405        |
| CCL2                   | -0,230        | <b>0,561</b> | 0,262         | 0,180         | 0,160        | -0,267        | 0,216         | 0,008         | -0,107        | -0,315       | -0,075                 | 1,000        | 0,212         | 0,153        | 0,179        | 0,083         | -0,021        | -0,054        |
| IFN-gamma              | 0,091         | -0,062       | 0,110         | -0,018        | -0,029       | -0,228        | -0,127        | <b>-0,459</b> | 0,117         | -0,115       | -0,343                 | 0,212        | 1,000         | 0,058        | -0,075       | 0,129         | 0,065         | 0,281         |
| ExCCL2                 | 0,070         | 0,280        | 0,011         | -0,023        | -0,020       | -0,095        | 0,168         | -0,037        | 0,082         | 0,040        | 0,100                  | 0,153        | 0,058         | 1,000        | <b>0,564</b> | -0,045        | 0,176         | 0,374         |
| ExINF-gamma            | 0,072         | 0,176        | 0,291         | 0,274         | 0,356        | -0,002        | 0,247         | 0,111         | -0,020        | 0,222        | 0,141                  | 0,179        | -0,075        | <b>0,564</b> | 1,000        | -0,069        | 0,186         | 0,022         |
| ExIL1beta              | -0,082        | 0,031        | <b>-0,403</b> | -0,227        | -0,342       | 0,363         | -0,321        | -0,005        | -0,085        | -0,070       | <b>-0,621</b>          | 0,083        | 0,129         | -0,045       | -0,069       | 1,000         | -0,166        | <b>0,514</b>  |
| ExProperdin            | -0,211        | -0,018       | 0,199         | -0,010        | 0,258        | 0,021         | 0,210         | -0,308        | 0,332         | -0,148       | 0,019                  | -0,021       | 0,065         | 0,176        | 0,186        | -0,166        | 1,000         | <b>-0,471</b> |
| ExFactorD              | 0,226         | 0,185        | -0,293        | -0,128        | -0,292       | 0,045         | -0,209        | -0,021        | -0,153        | 0,261        | -0,405                 | -0,054       | 0,281         | 0,374        | 0,022        | <b>0,514</b>  | <b>-0,471</b> | 1,000         |

In bold, p-values <0.05
