# Supplementary material for: The Potential Role of Proinflammatory Cytokines and Complement Components in the Development of Drug-Induced Neuropathy in Patients with Multiple Myeloma
Source: MDPI journal article supplement (doi:10.3390/jcm10194584), 2021-10-04
Supplement: s1 [file s1]

Table S2. Spearman's correlation coefficients for clinical data and investigated factors in the pre-treatment group without neuropathy.

|               | WBC          | RBC           | HGB           | HTC          | PLT           | MPV           | Total protein | IgG           | IgA           | IgM          | FLCs kappa    | FLCs lambda   | CCL2         | IL-1beta     | IFN-gamma    | ExCCL2        | ExINF-gamma  | ExIL1beta     | ExProperdin  |
|---------------|--------------|---------------|---------------|--------------|---------------|---------------|---------------|---------------|---------------|--------------|---------------|---------------|--------------|--------------|--------------|---------------|--------------|---------------|--------------|
| WBC           | 1,000        | 0,081         | 0,114         | 0,092        | <b>0,331</b>  | 0,126         | -0,139        | 0,039         | -0,245        | 0,074        | -0,103        | 0,008         | 0,028        | 0,194        | 0,024        | -0,031        | -0,129       | -0,103        | -0,002       |
| RBC           | 0,081        | 1,000         | <b>0,956</b>  | <b>0,966</b> | <b>0,393</b>  | 0,061         | -0,195        | 0,016         | 0,038         | <b>0,380</b> | -0,137        | -0,049        | 0,006        | 0,184        | 0,009        | <b>-0,290</b> | -0,158       | 0,018         | 0,003        |
| HGB           | 0,114        | <b>0,956</b>  | 1,000         | <b>0,979</b> | <b>0,393</b>  | 0,074         | -0,203        | 0,052         | 0,048         | <b>0,329</b> | -0,221        | -0,027        | 0,004        | 0,217        | 0,032        | <b>-0,263</b> | -0,122       | 0,015         | 0,007        |
| HTC           | 0,092        | <b>0,966</b>  | <b>0,979</b>  | 1,000        | <b>0,405</b>  | 0,102         | -0,239        | -0,013        | 0,058         | <b>0,347</b> | -0,226        | -0,011        | 0,030        | 0,250        | 0,024        | -0,240        | -0,117       | -0,019        | -0,026       |
| PLT           | <b>0,331</b> | <b>0,393</b>  | <b>0,393</b>  | <b>0,405</b> | 1,000         | <b>-0,306</b> | <b>-0,296</b> | -0,102        | -0,250        | <b>0,303</b> | -0,053        | -0,106        | 0,155        | 0,229        | -0,084       | -0,250        | -0,037       | 0,107         | -0,047       |
| MPV           | 0,126        | 0,061         | 0,074         | 0,102        | <b>-0,306</b> | 1,000         | -0,157        | -0,261        | 0,170         | -0,112       | -0,076        | 0,016         | 0,117        | -0,052       | 0,147        | 0,026         | -0,217       | <b>-0,295</b> | -0,025       |
| Total protein | -0,139       | -0,195        | -0,203        | -0,239       | <b>-0,296</b> | -0,157        | 1,000         | <b>0,644</b>  | 0,093         | -0,219       | -0,074        | -0,053        | -0,012       | 0,163        | 0,138        | 0,131         | 0,231        | 0,101         | 0,208        |
| IgG           | 0,039        | 0,016         | 0,052         | -0,013       | -0,102        | -0,261        | <b>0,644</b>  | 1,000         | <b>-0,403</b> | 0,164        | -0,070        | 0,120         | -0,151       | 0,222        | 0,121        | 0,120         | 0,021        | 0,061         | 0,012        |
| IgA           | -0,245       | 0,038         | 0,048         | 0,058        | -0,250        | 0,170         | 0,093         | <b>-0,403</b> | 1,000         | 0,184        | -0,198        | 0,155         | -0,012       | -0,055       | 0,130        | -0,169        | 0,217        | 0,092         | -0,049       |
| IgM           | 0,074        | <b>0,380</b>  | <b>0,329</b>  | <b>0,347</b> | <b>0,303</b>  | -0,112        | -0,219        | 0,164         | 0,184         | 1,000        | -0,164        | <b>0,391</b>  | -0,052       | 0,013        | -0,060       | -0,264        | -0,065       | 0,005         | -0,077       |
| FLCs kappa    | -0,103       | -0,137        | -0,221        | -0,226       | -0,053        | -0,076        | -0,074        | -0,070        | -0,198        | -0,164       | 1,000         | <b>-0,478</b> | -0,085       | -0,177       | -0,110       | -0,062        | -0,126       | <b>0,269</b>  | -0,046       |
| FLCs lambda   | 0,008        | -0,049        | -0,027        | -0,011       | -0,106        | 0,016         | -0,053        | 0,120         | 0,155         | <b>0,391</b> | <b>-0,478</b> | 1,000         | -0,207       | -0,024       | 0,085        | -0,043        | 0,133        | <b>-0,271</b> | 0,082        |
| CCL2          | 0,028        | 0,006         | 0,004         | 0,030        | 0,155         | 0,117         | -0,012        | -0,151        | -0,012        | -0,052       | -0,085        | -0,207        | 1,000        | <b>0,281</b> | <b>0,322</b> | 0,082         | 0,035        | 0,165         | 0,063        |
| IL-1beta      | 0,194        | 0,184         | 0,217         | 0,250        | 0,229         | -0,052        | 0,163         | 0,222         | -0,055        | 0,013        | -0,177        | -0,024        | <b>0,281</b> | 1,000        | 0,166        | 0,191         | 0,140        | -0,035        | 0,141        |
| IFN-gamma     | 0,024        | 0,009         | 0,032         | 0,024        | -0,084        | 0,147         | 0,138         | 0,121         | 0,130         | -0,060       | -0,110        | 0,085         | <b>0,322</b> | 0,166        | 1,000        | 0,103         | -0,079       | 0,129         | -0,167       |
| ExCCL2        | -0,031       | <b>-0,290</b> | <b>-0,263</b> | -0,240       | -0,250        | 0,026         | 0,131         | 0,120         | -0,169        | -0,264       | -0,062        | -0,043        | 0,082        | 0,191        | 0,103        | 1,000         | 0,173        | -0,241        | 0,113        |
| ExINF-gamma   | -0,129       | -0,158        | -0,122        | -0,117       | -0,037        | -0,217        | 0,231         | 0,021         | 0,217         | -0,065       | -0,126        | 0,133         | 0,035        | 0,140        | -0,079       | 0,173         | 1,000        | -0,033        | <b>0,265</b> |
| ExIL1beta     | -0,103       | 0,018         | 0,015         | -0,019       | 0,107         | <b>-0,295</b> | 0,101         | 0,061         | 0,092         | 0,005        | <b>0,269</b>  | <b>-0,271</b> | 0,165        | -0,035       | 0,129        | -0,241        | -0,033       | 1,000         | -0,073       |
| ExProperdin   | -0,002       | 0,003         | 0,007         | -0,026       | -0,047        | -0,025        | 0,208         | 0,012         | -0,049        | -0,077       | -0,046        | 0,082         | 0,063        | 0,141        | -0,167       | 0,113         | <b>0,265</b> | -0,073        | 1,000        |

In bold, p-values <0.05
