# Supplementary material for: The Potential Role of Proinflammatory Cytokines and Complement Components in the Development of Drug-Induced Neuropathy in Patients with Multiple Myeloma
Source: MDPI journal article supplement (doi:10.3390/jcm10194584), 2021-10-04
Supplement: s1 [file s1]

Table S1. The list of the selected down and up regulated genes in all groups.

| <b>A. plusNdT vs. bT</b>       |                                                                  |             |            |
|--------------------------------|------------------------------------------------------------------|-------------|------------|
| Gene symbol                    | Gene name                                                        | Fold change | adj. p.val |
| ALAS2                          | 5'-aminolevulinate synthase 2                                    | 11.61       | <0.01      |
| SNORA13                        | small nucleolar RNA, H/ACA box 13                                | 10.36       | <0.01      |
| SNORA50C                       | small nucleolar RNA, H/ACA box 50C                               | 10.06       | <0.01      |
| SNORD70                        | small nucleolar RNA, C/D box 70                                  | 9.08        | <0.01      |
| SNORA26                        | small nucleolar RNA, H/ACA box 26                                | 8.93        | <0.01      |
| SNORA5A                        | small nucleolar RNA, H/ACA box 5A                                | 8.38        | <0.01      |
| H2AC13                         | H2A clustered histone 13                                         | 8.03        | <0.01      |
| LOC105377884                   | uncharacterized LOC105377884                                     | 7.11        | <0.01      |
| SNORD121A                      | small nucleolar RNA, C/D box 121A                                | 7.05        | <0.01      |
| SCARNA14                       | small Cajal body-specific RNA 14                                 | 6.26        | <0.01      |
| CFD                            | complement factor D                                              | 3.99        | <0.01      |
| CFP                            | complement factor properdin                                      | 3.12        | <0.01      |
| IFN-GAMMA                      | interferon gamma                                                 | 2.3         | <0.01      |
| IL-1BETA                       | interleukin 1 beta                                               | 1.74        | <0.01      |
| CCL2                           | C-C motif chemokine ligand 2                                     | 1.41        | <0.01      |
| USP17L12                       | ubiquitin specific peptidase 17 like family member 12            | -22.59      | <0.01      |
| USP17L17                       | ubiquitin specific peptidase 17 like family member 17            | -24.04      | <0.01      |
| USP17L18                       | ubiquitin specific peptidase 17 like family member 18            | -24.99      | <0.01      |
| USP17L20                       | ubiquitin specific peptidase 17 like family member 20            | -25.35      | <0.01      |
| USP17L11                       | ubiquitin specific peptidase 17 like family member 11            | -25.62      | <0.01      |
| USP17L25                       | ubiquitin specific peptidase 17 like family member 25            | -25.71      | <0.01      |
| USP17L22                       | ubiquitin specific peptidase 17 like family member 22            | -26.35      | <0.01      |
| USP17L6P                       | ubiquitin specific peptidase 17 like family member 6, pseudogene | -27.12      | <0.01      |
| USP17L5                        | ubiquitin specific peptidase 17 like family member 5             | -30.68      | <0.01      |
| ZNF595                         | zinc finger protein 595                                          | -46.52      | <0.01      |
| <b>B. minusNdT vs. bT</b>      |                                                                  |             |            |
| SERPING1                       | serpin family G member 1                                         | 5.45        | <0.01      |
| HP                             | haptoglobin                                                      | 3.77        | <0.01      |
| SIGLEC14                       | sialic acid binding Ig like lectin 14                            | 3.71        | <0.01      |
| CHI3L1                         | chitinase 3 like 1                                               | 3.63        | <0.01      |
| SCARNA5                        | small Cajal body-specific RNA 5                                  | 3.49        | <0.01      |
| IFI44                          | interferon induced protein 44                                    | 3.47        | <0.01      |
| IFI44L                         | interferon induced protein 44 like                               | 3.41        | <0.01      |
| H2BC8                          | H2B clustered histone 8                                          | 3.26        | <0.01      |
| RSAD2                          | radical S-adenosyl methionine domain containing 2                | 3.19        | <0.01      |
| CRISP3                         | cysteine rich secretory protein 3                                | 3.13        | <0.01      |
| TRGV3                          | T cell receptor gamma variable 3                                 | -2.98       | <0.01      |
| CD22                           | CD22 molecule                                                    | -2.98       | <0.01      |
| CD79A                          | CD79a molecule                                                   | -3.23       | <0.01      |
| JCHAIN                         | joining chain of multimeric IgA and IgM                          | -3.29       | <0.01      |
| DEFA4                          | defensin alpha 4                                                 | -3.32       | <0.01      |
| IL18RAP                        | interleukin 18 receptor accessory protein                        | -3.39       | <0.01      |
| OLAH                           | oleoyl-ACP hydrolase                                             | -3.98       | <0.01      |
| IL18R1                         | interleukin 18 receptor 1                                        | -4.01       | <0.01      |
| PFKFB2                         | 6-phosphofructo-2-kinase/fructose-2,6-biphosphatase 2            | -4.97       | <0.01      |
| IL1R2                          | interleukin 1 receptor type 2                                    | -5.76       | <0.01      |
| <b>C. plusNdT vs. minusNdT</b> |                                                                  |             |            |

|           |                                                                  |        |       |
|-----------|------------------------------------------------------------------|--------|-------|
| ALAS2     | 5 <sup>-</sup> -aminolevulinate synthase 2                       | 18.01  | <0.01 |
| SNORA13   | small nucleolar RNA, H/ACA box 13                                | 9.77   | <0.01 |
| SNORD70   | small nucleolar RNA, C/D box 70                                  | 7.69   | <0.01 |
| TRGV3     | T cell receptor gamma variable 3                                 | 7.65   | <0.01 |
| SNORA50C  | small nucleolar RNA, H/ACA box 50C                               | 7.64   | <0.01 |
| SNORA26   | small nucleolar RNA, H/ACA box 26                                | 7.63   | <0.01 |
| SNORA5A   | small nucleolar RNA, H/ACA box 5A                                | 7.16   | <0.01 |
| SNORD111  | small nucleolar RNA, C/D box 111                                 | 6.12   | <0.01 |
| RNU5D-1   | RNA, U5D small nuclear 1                                         | 6.10   | <0.01 |
| SNORD121A | small nucleolar RNA, C/D box 121A                                | 5.92   | <0.01 |
| CFD       | complement factor D                                              | 3.05   | <0.01 |
| IFN-GAMMA | interferon gamma                                                 | 1.9    | <0.01 |
| CFP       | complement factor properdin                                      | 1.77   | <0.01 |
| IL-1BETA  | interleukin 1 beta                                               | 1.26   | 0.06  |
| CCL2      | C-C motif chemokine ligand 2                                     | 1.13   | 0.3   |
| USP17L12  | ubiquitin specific peptidase 17 like family member 12            | -12.59 | <0.01 |
| USP17L25  | ubiquitin specific peptidase 17 like family member 25            | -13.71 | <0.01 |
| USP17L20  | ubiquitin specific peptidase 17 like family member 20            | -13.79 | <0.01 |
| LINC00965 | long intergenic non-protein coding RNA 965                       | -13.80 | <0.01 |
| USP17L18  | ubiquitin specific peptidase 17 like family member 18            | -13.89 | <0.01 |
| USP17L22  | ubiquitin specific peptidase 17 like family member 22            | -13.98 | <0.01 |
| USP17L11  | ubiquitin specific peptidase 17 like family member 11            | -13.99 | <0.01 |
| USP17L6P  | ubiquitin specific peptidase 17 like family member 6, pseudogene | -14.80 | <0.01 |
| USP17L5   | ubiquitin specific peptidase 17 like family member 5             | -15.99 | <0.01 |
| ZNF595    | zinc finger protein 595                                          | -31.57 | <0.01 |
