# Supplementary material for: The Potential Role of Proinflammatory Cytokines and Complement Components in the Development of Drug-Induced Neuropathy in Patients with Multiple Myeloma
Source: J Clin Med. 2021 Oct 4;10(19):4584. doi: 10.3390/jcm10194584 (PMC8509696; doi:10.3390/jcm10194584)
Supplement: Supplementary file 1 [file jcm-10-04584-s001.zip]

Archive with 7 entries (7 files):
- fig s1.pdf
- fig s2.pdf
- fig s3.pdf
- tab s1.pdf
- tab s2.pdf
- tab s3.pdf
- tab s4.pdf
