# Supplementary figures and images for: The Potential Role of Proinflammatory Cytokines and Complement Components in the Development of Drug-Induced Neuropathy in Patients with Multiple Myeloma
Source: MDPI journal article supplement (doi:10.3390/jcm10194584), 2021-10-04

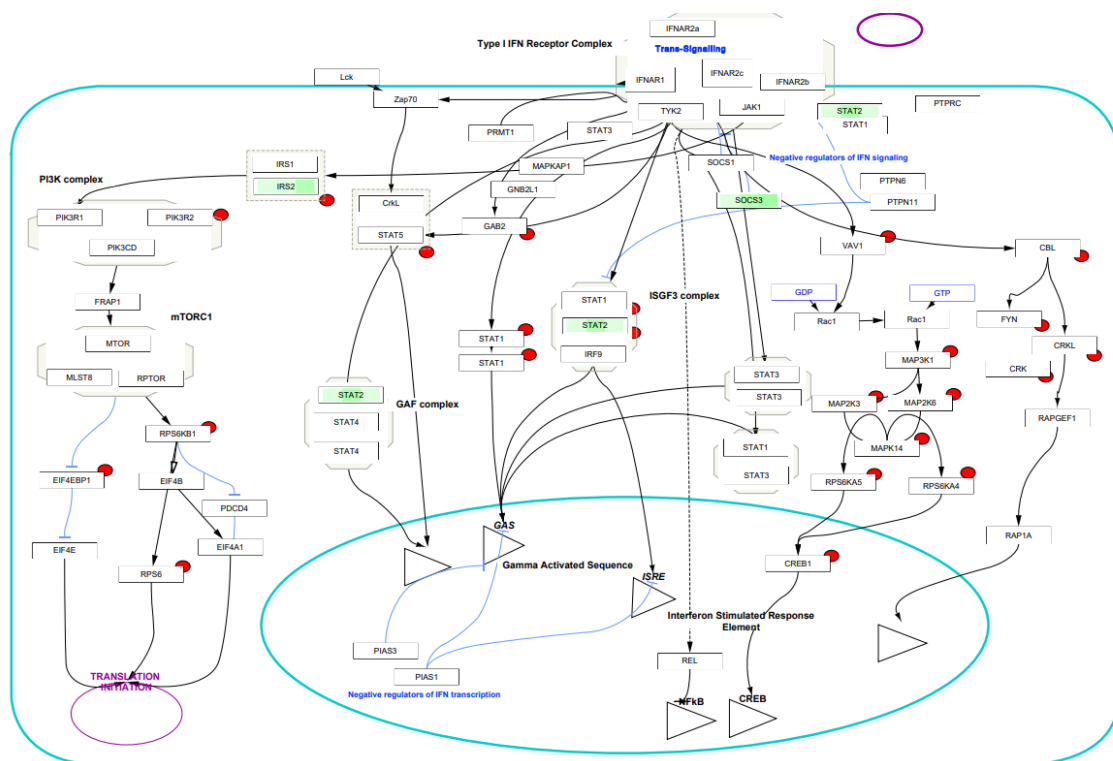

Figure S2. Cell signaling after IFN- $\gamma$  receptor activation.

Supplement: s1 [file s1]

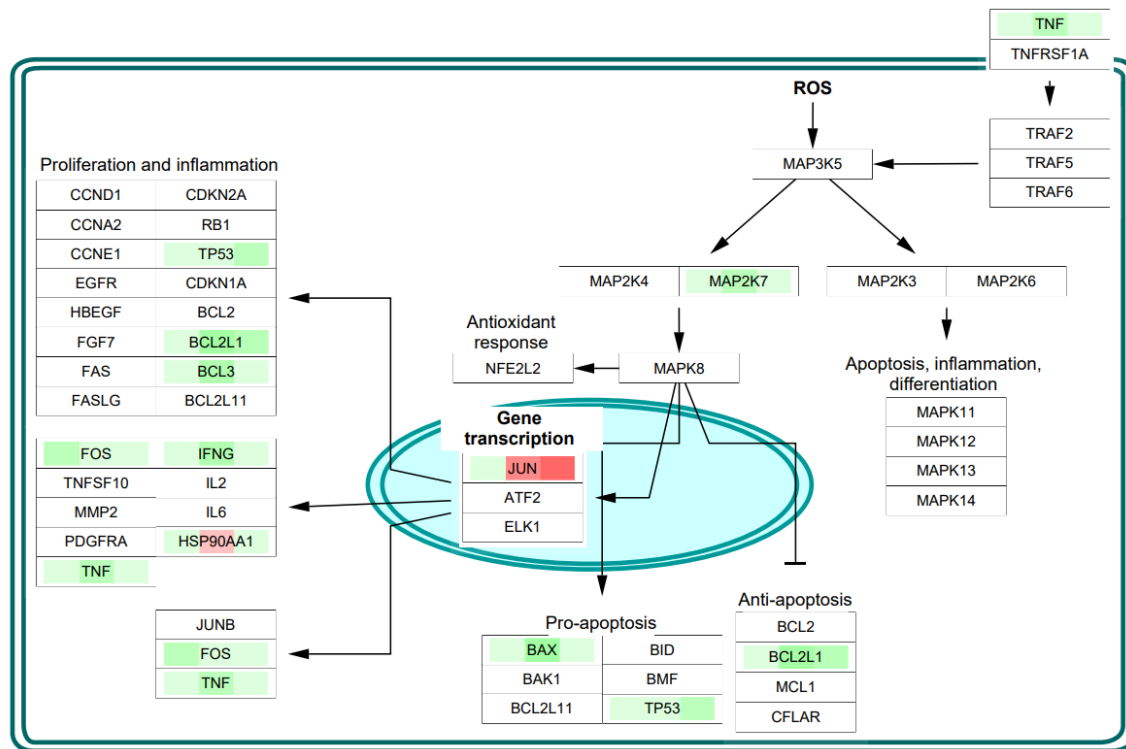

Figure S3. Cell signaling pathways following TNF activation.

Supplement: s1 [file s1]

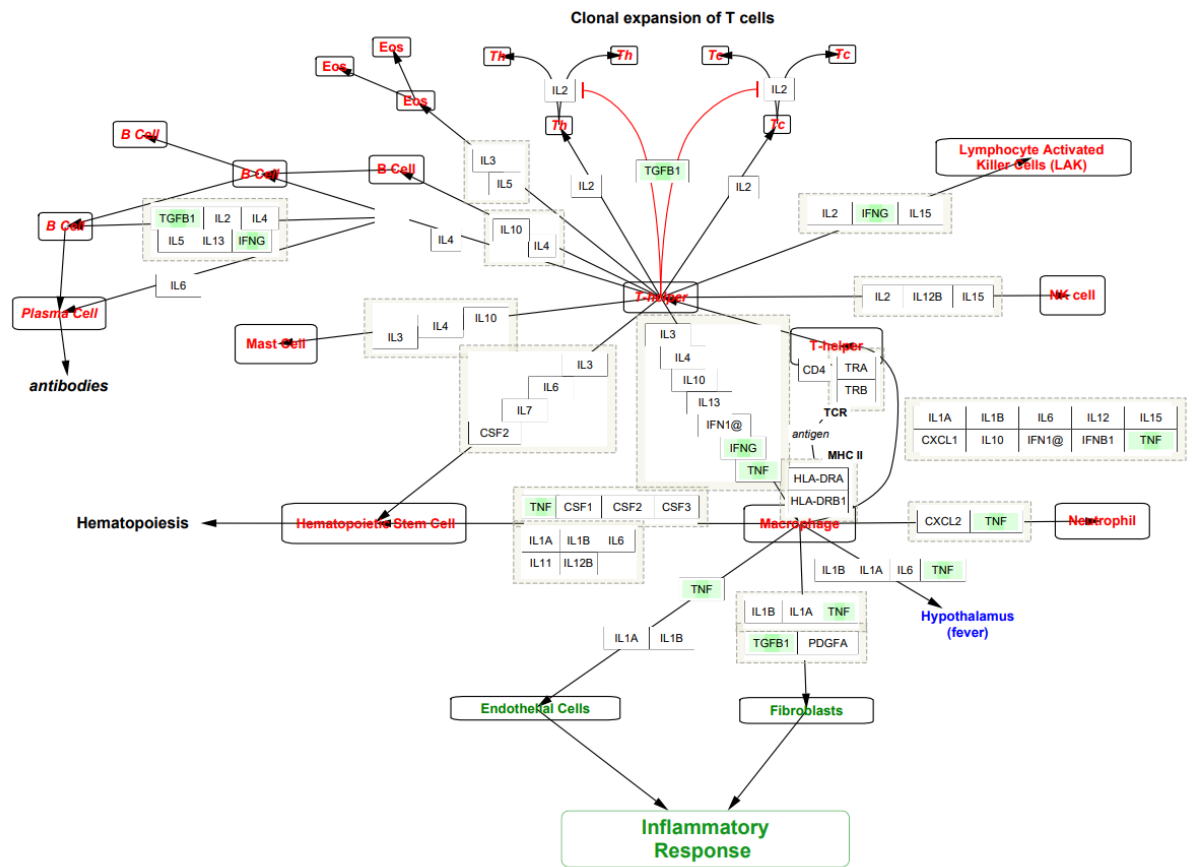

Supplement: s1 [file s1]
